# Supplementary material for: Isolation and sequence analysis of the wheat B genome subtelomeric DNA
Source: PubMed Central journal article supplement (PMC2756281; doi:10.1186/1471-2164-10-414), 2009-09-05
Supplement: 1471-2164-10-414-S1.pdf [file 1471-2164-10-414-S1.pdf]

205008\_1-1 .....C.....C.....G.....T.....  
 205008\_1-2 .....C.....G.A.....A.....T.....G.....T.....  
 205008\_1-5 ...C..C.....C.....C.....T.....AT.....G.....A.....  
 205008\_2-19 .....G.....T.....T.....T.....G.....C.....G.....  
 205008\_2-17 .....C.....T.....T.....T.....T.....G.....  
 205008\_2-8 .....C.....C.TT.....A.....T.....G.....  
 205008\_2-5 .....C..T.....G.....C.....A.....  
 205008\_2-11 .....C..T.....G.....C.....A.....  
 205008\_2-14 .....T..T.....A.....C.....A.....  
 205008\_2-4 .....C.....T.....AC.....G.....  
 205008\_1-3 .....C.....A.....A.....C.....CA.....A.....  
 205008\_1-6 .....C..T.....T.T..G.....A.....C.....C.....T.A.....  
 205008\_2-12 .....C.....T.....T.....T.....-.....T.....G.....  
 205008\_2-9 .....C.....T.....T.....T.....T.....G.....  
 205008\_2-7 .....C.....A.....C.A.....T.....G.G.....A.....  
 205008\_2-15 .....A.A.....A.....C.A.....A.....T.....A.....  
 205008\_2-18 C.....C.....AC.....A.....-.....T.....G.....  
 205008\_2-6 .....T.....-T.....G.....T.....CA.....G.....T.....  
 205008\_2-16 .....C.....-.....T.....C.....G.....A.....T.....A.....  
 205008\_1-4 .....C.....T.....A.....  
 205008\_1-7 .....C.....T.....G.....  
 205008\_2-10 .....T..T.....A.....T.....T.....AT.....T.....  
 205008\_2-13 .....T.....A.....T.....A.....T.....G.....  
 205008\_2-2 .....C.....T.....T.A.....T.....A.....  
 205008\_2-3 .....C.....T.....A.....T.....  
 CONSENSUS GTTAGTTcTGAgTGAATTCCCTcGcGTATGATCATTcTTTcATCagTTTGTTcccCgTTTCTTcTCTAGtCTGAGCCTAgCACACTATTCTAGcTATCCAT

\*\* \*\* \* \* \* \* \* \* \* \* \* \* \* \* \* \* \* \* \* \* \* \* \* \* \* \* \* \* \* \* \* \* \* \*

205008\_1-1 .....--.....C...A.T.....G.A.....A.....T.....A.....G.....  
 205008\_1-2 .....--..A.....C.....G.....T.T.....G.....G.....  
 205008\_1-5 .....--GC.....C...A.....G.....A.....G.....G.....T.....T.....  
 205008\_2-19 .....--..A.....C.....T.....T.....G.....G.....T.....A.....  
 205008\_2-17 .....--.....C.....T.....AG..T.....A.....T.....TT.....T.A.....A.....  
 205008\_2-8 .T....TG...T.....C.....G.....A.T.....C.....CG.....  
 205008\_2-5 .....--.....C.....T.....G.....T..G..T.....G.....  
 205008\_2-11 .....--.....T...C.A.....G.....G.....C.....G.....G.....  
 205008\_2-14 .....--.....C.....A.....G.....G.T.....G.....T.G.....

```
205008_2-4      .....--.....C...A.....G..A..G.....A.....T.....G.....
205008_1-3      .....--.....G.....A.....G.....A.A.....A.....G.....
205008_1-6      .....--.....G.....A.....G.....A.....A.....T.G.....
205008_2-12     .....--.....G.....A.....G.....A.....G.....
205008_2-9      .....--.....G.....AG.....A.....G.....
205008_2-7      .....--.....G.....A.C...A.T...A.....A.....G.....
205008_2-15     .....C--.....TC.....AA.....G.....A.....T.....G.....G.....GTG
205008_2-18     .....--.....A.C.G.....A.....A.....T.A.....T.....
205008_2-6      .....--.....C.....A.....G.....T.....-...A.....A..A..A
205008_2-16     .....--.....C.A.....G.....A.....T.....T.....G.....
205008_1-4      .....--.....G...C.A.....A.G...A...A...A...G...T.G...A..
205008_1-7      .....--.....G...C.A.....A.G...A...TA..G...C...G.....
205008_2-10     T.-.....--.....C.....A..G.G..G.....T.....C..CG.....
205008_2-13     .....--.....G...C.A.....G.G...A...A..G...G...CG.....
205008_2-2      ---...TG.....C.....T.....G.....T.....C.....
205008_2-3      ...A..-----A.....G.....TA.A...AAAA.-----A.G.....
CONSENSUS      GGgTGTG--GCTCgTaACACcTgATgACCAAACGgATCTACGgCaCCATCgAATCTCAAACtTtTAACTGccAAAAcTTtTgTtTTTCATCctgTAGTCcc
                * *                                * * * * * * * * * * * * * * * * * * * * * * * * * * * * * *
```

201

300

```
205008_1-1      .....C--.....CT.....CA.....G.....
205008_1-2      ...T.....A.....C--...C.A.T.....C.....GA.....
205008_1-5      .....T...T.....G--...C...T.....C.....GA.....
205008_2-19     .....T--...T..C.....T.....C.A.....A..A.....
205008_2-17     .....C--T...T...T.....CA.....TG..TT.....
205008_2-8      .....G.....C--...T...C...T.A.....C...G.....G.....
205008_2-5      .....G...-..T.....C--...C...A..T.....T...G.....AG.....
205008_2-11     .....T.....C..T--...A...C.....C...G.....G.....T..
205008_2-14     .....T--...G...C.....A...A.....C.....G.....
205008_2-4      ...C.....GGA.....C.....TC.....C...T.....G...C.....
205008_1-3      .....GA.C--...G...C...G...A.....C...G..T.....A.....
205008_1-6      .....G...C--...C...C...A...A...A.....C..G..T.....A.....
205008_2-12     .....T--.....CT.....A...A...A.....C..G..T.....A.....A
205008_2-9      .....A.C--...CC...A...A.....CA.....T...A.....
205008_2-7      .....C--...C.....T.....T..C.....A.....
205008_2-15     .....AT.....C--...C.....C.....G...C.....
205008_2-18     .....C--...-AT.....A.....T.....G..G.....
205008_2-6      .....C.....G--...C...T...T.....C.....G...T.C...A
205008_2-16     .....A..G.....GTC.T...GG.T.-----C.....T.....T...C.A.....A.....
205008_1-4      .....G.....T..GC-...C...T...A.....C.....AG.....
```

```

205008_1-7      .....G...G...-..GC-.....C.....T.....-----G.....
205008_2-10    .....C--.A...A.....G.AC...C.....G.....-..
205008_2-13    .....A.....C--...A...AT...C..C.....C.....T...G...G...-..
205008_2-2     ...-TT.....AA.....C--...AT.....T.G.....G..A.....-----
205008_2-3     .....T.....C--...CT.....T.....GA.....
CONSENSUS      TTTTAgAATTACTAAacgTCcTTTTTtggGc--CgAGATTTccAGGAAcgcTTTTcTcGGGgTTTGTGTGCacgTAtTtcAAATCATAcggACctaAAaAt
***          * * * * *          *** *          *** * *          **          ** * * * * *          *

```

|             |                                                                                                      | 301 | 382 | % identity with<br>consensus |
|-------------|------------------------------------------------------------------------------------------------------|-----|-----|------------------------------|
| 205008_1-1  | .....T.....C.....C.....C...CA.....T...C..C.....                                                      |     | 378 | (96%)                        |
| 205008_1-2  | .....G.....T..C.....C.....C...--.....G..C..C.....                                                    |     | 376 | (96%)                        |
| 205008_1-5  | ...G..G.....T..C.....C.....C...--..A.....C..C.....                                                   |     | 376 | (93%)                        |
| 205008_2-19 | .....T.....A.....C.....T...--A.....T..T.....T.....                                                   |     | 376 | (94%)                        |
| 205008_2-17 | .....T.....A.....T.....T...C...--.....C..C.....                                                      |     | 376 | (94%)                        |
| 205008_2-8  | .....T.....C.....G.....C...--.....C..C.....                                                          |     | 378 | (94%)                        |
| 205008_2-5  | .....T.....C..T..C.....C.A.--.....C..GA.....                                                         |     | 375 | (94%)                        |
| 205008_2-11 | .A...T.....C.....A.....C...--.....C..C.....                                                          |     | 375 | (95%)                        |
| 205008_2-14 | .....T.....C.....C.....C...--.....T...C..C.....A...T.....                                            |     | 375 | (95%)                        |
| 205008_2-4  | ....ATT.....C.....C..C.....G...--.....C..C.C.....G..                                                 |     | 378 | (94%)                        |
| 205008_1-3  | .....G.....C.....C.....T..TT--.....A..A..C.....                                                      |     | 375 | (93%)                        |
| 205008_1-6  | .....G...A..C.....C.....T...T--A.....A..C.....                                                       |     | 376 | (92%)                        |
| 205008_2-12 | .....G.....C.....C.....C...T--.....A..C.....                                                         |     | 375 | (95%)                        |
| 205008_2-9  | ..--T.....C.....C.....C...T--.....A...CT..C.....T.....                                               |     | 374 | (95%)                        |
| 205008_2-7  | .....T.....C.....C.....A..C...--.....T...C..C.....                                                   |     | 375 | (95%)                        |
| 205008_2-15 | .....T...T..G...C.....C...--.....C..C.....                                                           |     | 375 | (93%)                        |
| 205008_2-18 | .....T.....A.....C.....C...--.....TA...C.A.C...T.....                                                |     | 375 | (94%)                        |
| 205008_2-6  | .....T.....C.....A.....C...--.....T...C..C.....                                                      |     | 374 | (93%)                        |
| 205008_2-16 | .....T.....C.....C.....C...--.....C...CA.....C...T.....                                              |     | 372 | (93%)                        |
| 205008_1-4  | ...T.T.....A.....CT.A.....AA..T.--.....T..C.A.T...T.....                                             |     | 377 | (92%)                        |
| 205008_1-7  | ...T.T.....A.....C.....T..AA..T.--.....C.A.T...T.....                                                |     | 367 | (92%)                        |
| 205008_2-10 | .....T.CA...A.....C.....C...--..G.....-----G.....                                                    |     | 363 | (92%)                        |
| 205008_2-13 | .....C.....A.....T.....C...--..G...T...-----C..G.....                                                |     | 364 | (92%)                        |
| 205008_2-2  | .G...T.....A.....C.A.....AC.A.--A..G..C.....C..CA...A.....                                           |     | 367 | (90%)                        |
| 205008_2-3  | .....C.....C..C.....C.....C...--.....T...C..AT.....                                                  |     | 359 | (88%)                        |
| CONSENSUS   | TAGAAGtCATTCcATcTTTATTcCCTAGAGCCTTccAGcA--gTTCCTAAAccGCTCcgTcggaGcACGTTATcaTTCTT                     |     | 376 |                              |
|             | *          * * * * *          * * * * *          * * * * *          **          *          * * * * * |     |     |                              |
